# Supplementary material for: Response of Pear Trees’ (Pyrus bretschneideri ‘Sinkiangensis’) Fine Roots to a Soil Water Regime of Regulated Deficit Irrigation
Source: MDPI journal article supplement (doi:10.3390/agronomy11112316), 2021-11-16
Supplement: s1 [file s1]

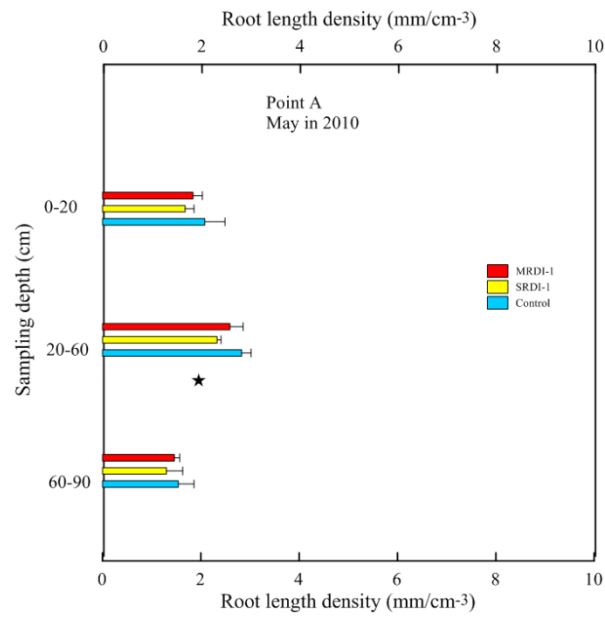

**Supplementary file: Figure S1.** The root length density of MRDI-1, SRDI-1 and control. MRDI-1 and SRDI-1 were applied with moderate and severe water stress during the stage 1 (0-30 DAB), respectively, and fully irrigated during other stages. Sampling point A was located in irrigated zone. Vertical bars represent one standard deviation of the mean. ☆ Means significant differences amongst various treatments in the same layer at the  $p < 0.05$  level.

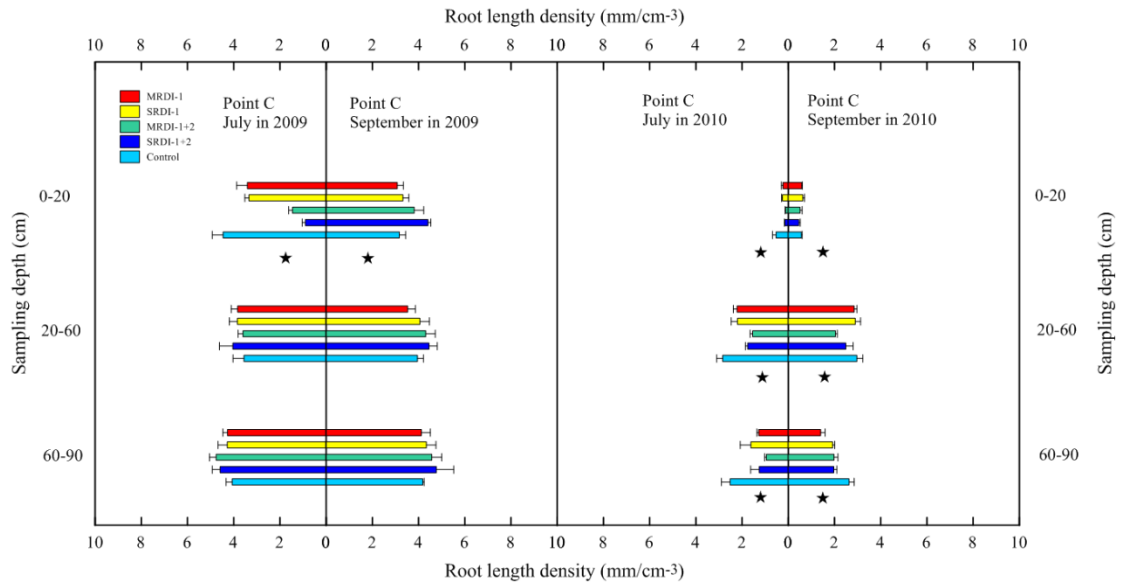

**Supplementary file: Figure S2.** The root length density of each treatment. MRDI-1 and SRDI-1 were applied with moderate and severe water stress applied during the stage 1 (0-30 DAB), respectively, and fully irrigated during other stages. MRDI-1+2 and SRDI-1+2 were applied with moderate and severe water stress during the stage 1 and 2 (0-86 DAB), respectively, and fully irrigated during other stages. Sampling point C were located in non-irrigated zones. Vertical bars represent one standard deviation of the mean. ☆ Means significant differences amongst various treatments in the same layer at the  $p < 0.05$  level.
