# Supplementary material for: Response of Pear Trees’ (Pyrus bretschneideri ‘Sinkiangensis’) Fine Roots to a Soil Water Regime of Regulated Deficit Irrigation
Source: MDPI journal article supplement (doi:10.3390/agronomy11112316), 2021-11-16
Supplement: s1 [file s1]

Archive with 1 entries (1 files):
- agronomy-1399457-supplementary.pdf
